# Supplementary material for: Phylogeny and evolution of chloroplast tRNAs in Adoxaceae
Source: PubMed Central journal article supplement (PMC7863635; doi:10.1002/ece3.7133), 2021-01-06
Supplement: ECE3-11-1294-s001.pdf [file ECE3-11-1294-s001.pdf]

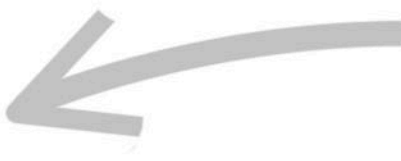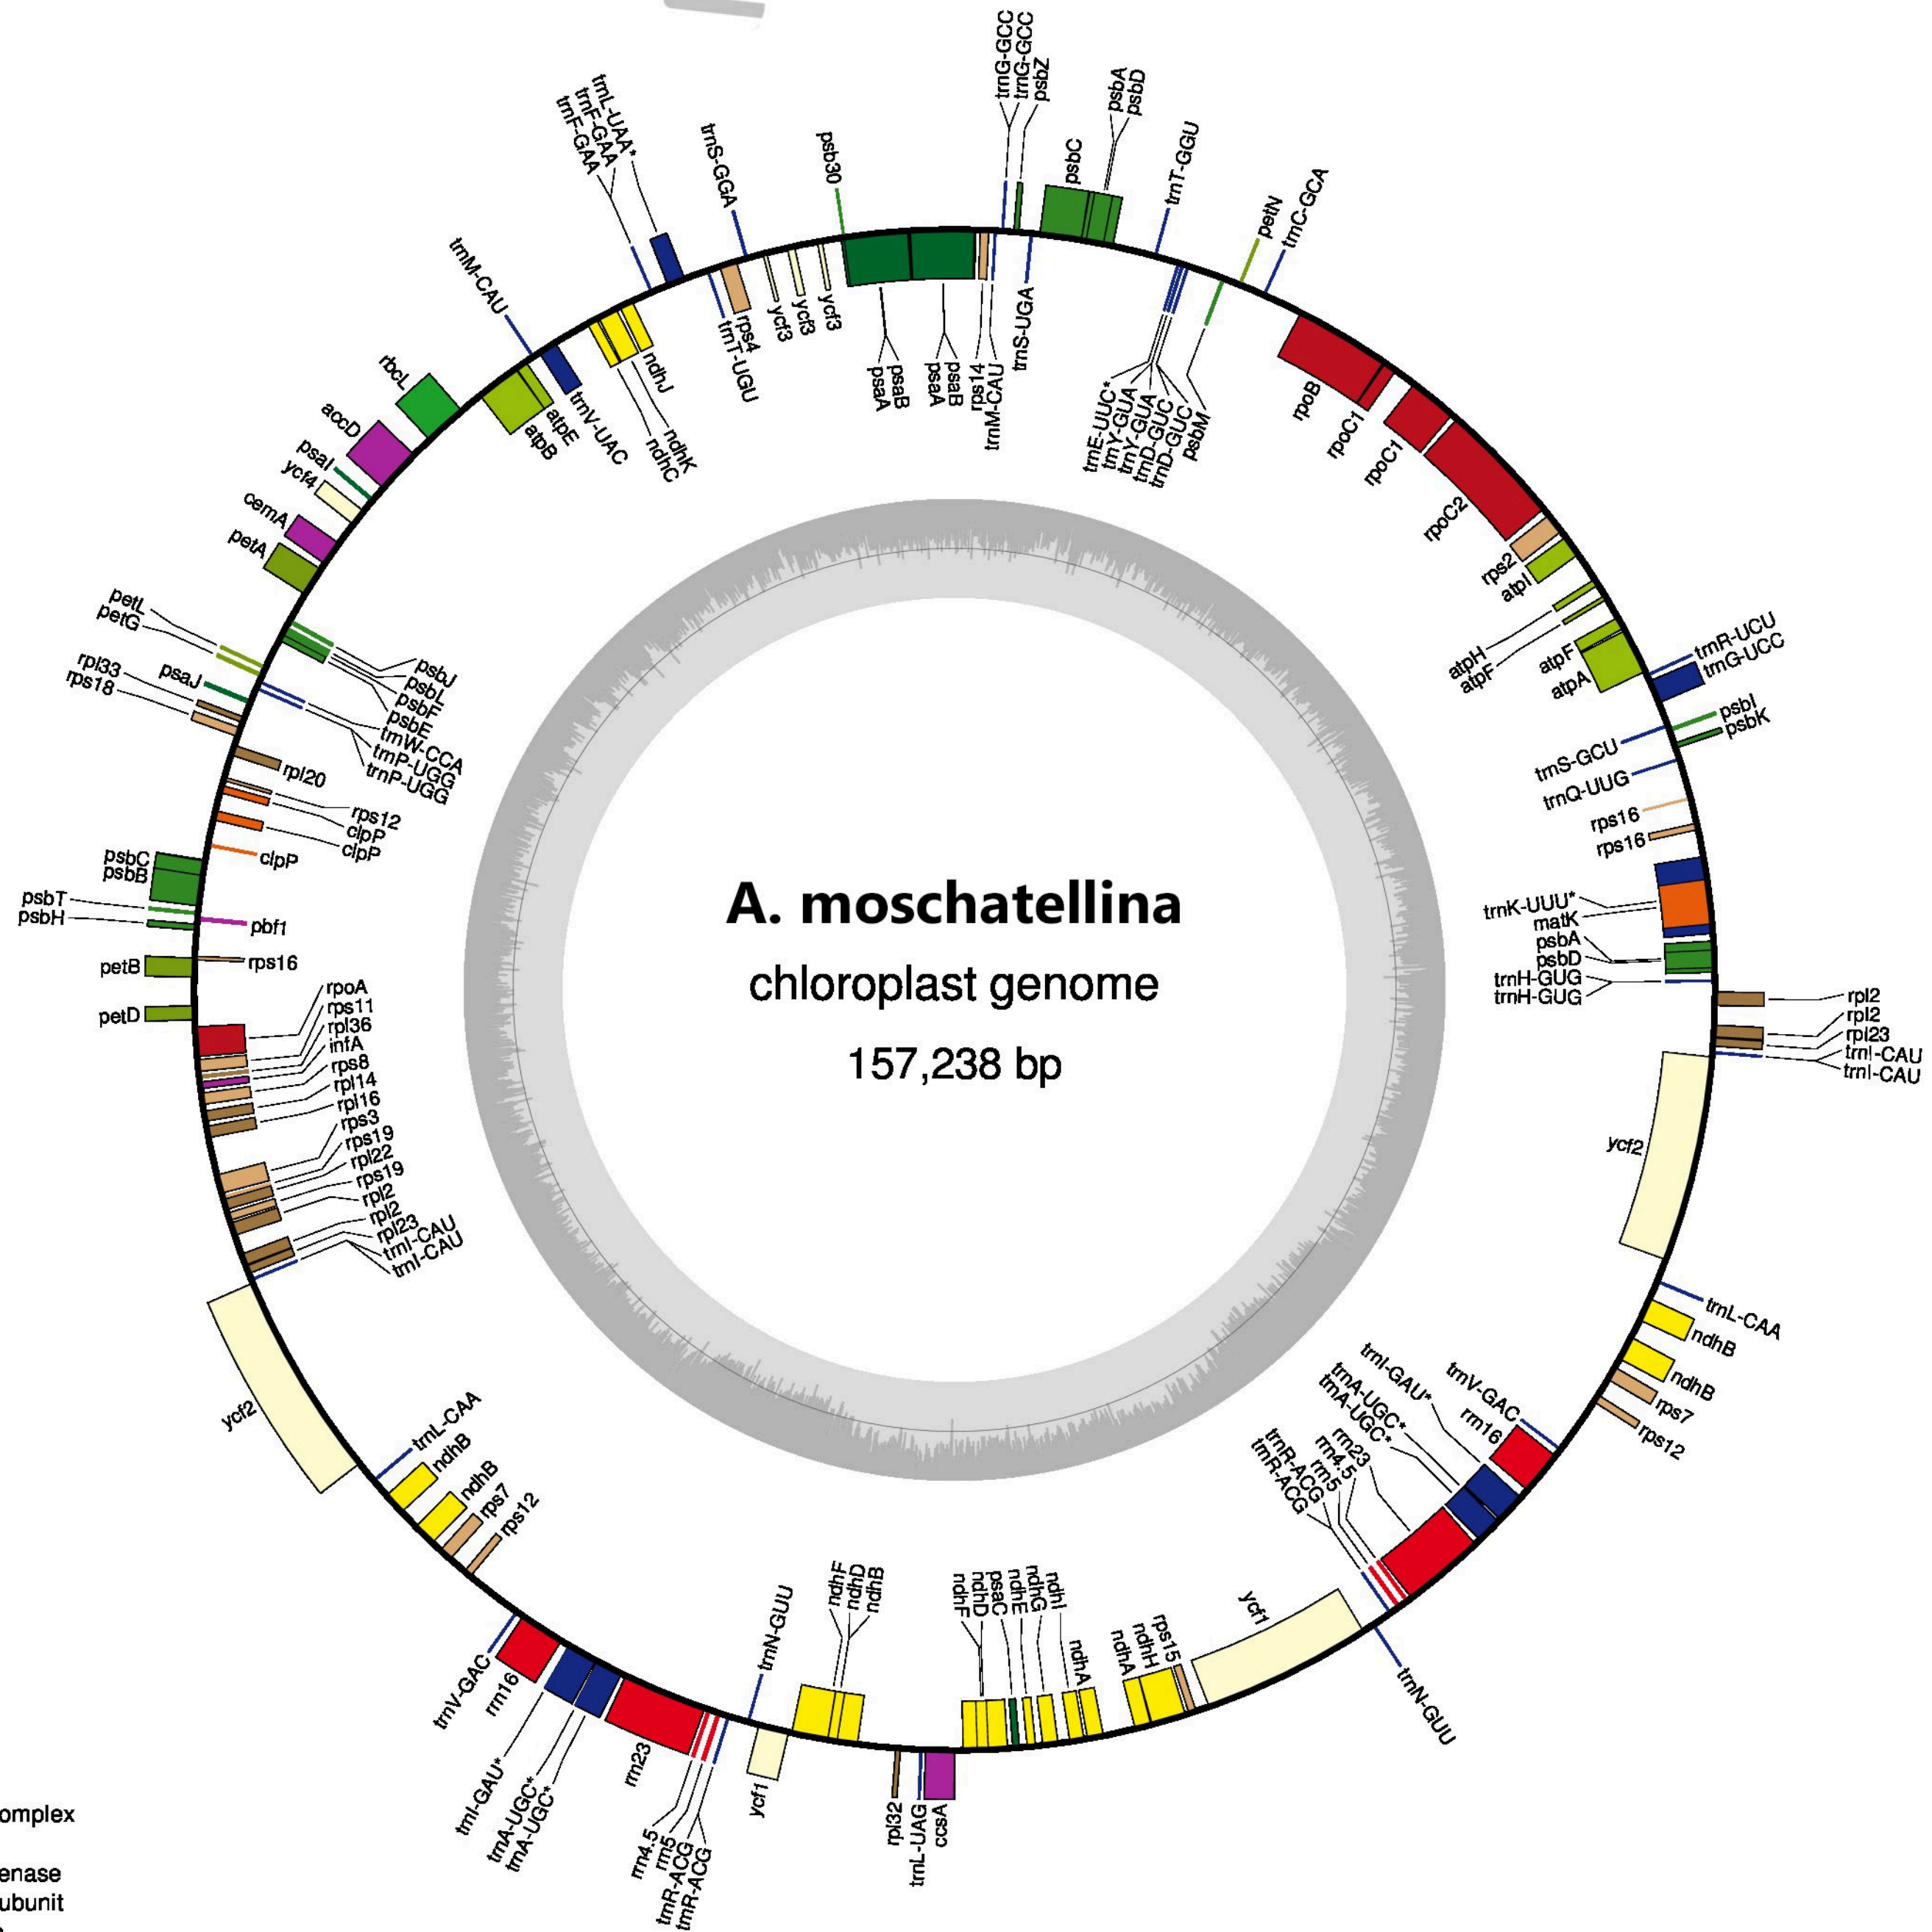

**A. moschatellina**  
chloroplast genome  
157,238 bp

- photosystem I
- photosystem II
- cytochrome b/f complex
- ATP synthase
- NADH dehydrogenase
- RubisCO large subunit
- RNA polymerase
- ribosomal proteins (SSU)
- ribosomal proteins (LSU)
- clpP, matK
- other genes
- hypothetical chloroplast reading frames (ycf)
- transfer RNAs
- ribosomal RNAs
