# Supplementary material for: Phylogeny and evolution of chloroplast tRNAs in Adoxaceae
Source: PubMed Central journal article supplement (PMC7863635; doi:10.1002/ece3.7133), 2021-01-06
Supplement: ECE3-11-1294-s002.pdf [file ECE3-11-1294-s002.pdf]

# Supplementary Table 1

Abreviations: nucleotide composition of acceptor stem (AA), donor (DA), T-loop (DL), anticodon loop (ACA), anticodon loop (ACL), variable loop (VL), pseudouridine arm (PA) and pseudourine loop (PL) of chloroplast rRNA.

| Gene                                  | Sequence (FRN)                                                     | Begin  | End    | Intron | Direction | Type | Anticodon | Length | AA | DA | DL | ACA | ACL | VL | PA | PL |
|---------------------------------------|--------------------------------------------------------------------|--------|--------|--------|-----------|------|-----------|--------|----|----|----|-----|-----|----|----|----|
| <i>S. corydalis</i> <sub>161</sub>    | GGGATGACACCAAGGATGAAAGGACGGATTTGATGACCAAGCTTCGGGGTCAATTCGGGTCTGGCC | 261    | 334    | 0      | reverse   | Lys  | GUG       | 74     | 7  | 3  | 11 | 5   | 7   | 5  | 7  |    |
| <i>S. corydalis</i> <sub>289</sub>    | GGGATGACACCAAGGATGAAAGGACGGATTTGATGACCAAGCTTCGGGGTCAATTCGGGTCTGGCC | 1839   | 4431   | 1      | reverse   | Lys  | UUU       | 72     | 7  | 4  | 7  | 4   | 7   | 6  | 5  |    |
| <i>S. corydalis</i> <sub>884</sub>    | TGGGGTACACCAAGGATGAAAGGACGGATTTGATGACCAAGCTTCGGGGTCAATTCGGGTCTGGCC | 7209   | 7289   | 0      | reverse   | Gln  | UUG       | 72     | 7  | 4  | 7  | 4   | 7   | 6  | 5  |    |
| <i>S. corydalis</i> <sub>978</sub>    | GGGATGACACCAAGGATGAAAGGACGGATTTGATGACCAAGCTTCGGGGTCAATTCGGGTCTGGCC | 12180  | 12260  | 0      | reverse   | Lys  | GUG       | 72     | 7  | 3  | 11 | 5   | 7   | 5  |    |    |
| <i>S. corydalis</i> <sub>7239</sub>   | GGGATGACACCAAGGATGAAAGGACGGATTTGATGACCAAGCTTCGGGGTCAATTCGGGTCTGGCC | 9728   | 10489  | 1      | forward   | Gly  | UCC       | 70     | 7  | 4  | 7  | 4   | 7   | 5  |    |    |
| <i>S. corydalis</i> <sub>10668</sub>  | GGGATGACACCAAGGATGAAAGGACGGATTTGATGACCAAGCTTCGGGGTCAATTCGGGTCTGGCC | 10668  | 10739  | 0      | forward   | Arg  | UCU       | 72     | 7  | 4  | 8  | 5   | 7   | 4  |    |    |
| <i>S. corydalis</i> <sub>28834</sub>  | GGGATGACACCAAGGATGAAAGGACGGATTTGATGACCAAGCTTCGGGGTCAATTCGGGTCTGGCC | 28834  | 28904  | 0      | forward   | Cys  | GCA       | 71     | 7  | 3  | 9  | 5   | 7   | 4  |    |    |
| <i>S. corydalis</i> <sub>31871</sub>  | GGGATGACACCAAGGATGAAAGGACGGATTTGATGACCAAGCTTCGGGGTCAATTCGGGTCTGGCC | 31844  | 31647  | 0      | reverse   | Asp  | GUC       | 74     | 7  | 4  | 9  | 5   | 7   | 5  |    |    |
| <i>S. corydalis</i> <sub>31723</sub>  | GGGATGACACCAAGGATGAAAGGACGGATTTGATGACCAAGCTTCGGGGTCAATTCGGGTCTGGCC | 31825  | 31889  | 0      | forward   | Lys  | GUG       | 72     | 7  | 4  | 8  | 5   | 7   | 5  |    |    |
| <i>S. corydalis</i> <sub>31874</sub>  | GGGATGACACCAAGGATGAAAGGACGGATTTGATGACCAAGCTTCGGGGTCAATTCGGGTCTGGCC | 31871  | 31643  | 0      | reverse   | Gly  | UUC       | 73     | 7  | 4  | 9  | 5   | 7   | 4  |    |    |
| <i>S. corydalis</i> <sub>32668</sub>  | GGGATGACACCAAGGATGAAAGGACGGATTTGATGACCAAGCTTCGGGGTCAATTCGGGTCTGGCC | 32668  | 32739  | 0      | forward   | Thr  | GGU       | 72     | 7  | 4  | 7  | 5   | 7   | 5  |    |    |
| <i>S. corydalis</i> <sub>36817</sub>  | GGGATGACACCAAGGATGAAAGGACGGATTTGATGACCAAGCTTCGGGGTCAATTCGGGTCTGGCC | 36817  | 36909  | 0      | reverse   | Ser  | UGA       | 93     | 7  | 4  | 9  | 5   | 7   | 24 |    |    |
| <i>S. corydalis</i> <sub>37776</sub>  | GGGATGACACCAAGGATGAAAGGACGGATTTGATGACCAAGCTTCGGGGTCAATTCGGGTCTGGCC | 37776  | 37846  | 0      | reverse   | Gly  | GCC       | 71     | 7  | 2  | 11 | 5   | 7   | 4  |    |    |
| <i>S. corydalis</i> <sub>40275</sub>  | GGGATGACACCAAGGATGAAAGGACGGATTTGATGACCAAGCTTCGGGGTCAATTCGGGTCTGGCC | 38189  | 38091  | 0      | reverse   | Met  | CAU       | 74     | 6  | 4  | 9  | 5   | 7   | 5  |    |    |
| <i>S. corydalis</i> <sub>4743</sub>   | GGGATGACACCAAGGATGAAAGGACGGATTTGATGACCAAGCTTCGGGGTCAATTCGGGTCTGGCC | 46275  | 46285  | 0      | forward   | Ser  | GGA       | 87     | 7  | 3  | 11 | 5   | 7   | 18 |    |    |
| <i>S. corydalis</i> <sub>47433</sub>  | GGGATGACACCAAGGATGAAAGGACGGATTTGATGACCAAGCTTCGGGGTCAATTCGGGTCTGGCC | 47633  | 47505  | 0      | reverse   | Thr  | UGU       | 73     | 7  | 4  | 8  | 5   | 7   | 5  |    |    |
| <i>S. corydalis</i> <sub>48303</sub>  | GGGATGACACCAAGGATGAAAGGACGGATTTGATGACCAAGCTTCGGGGTCAATTCGGGTCTGGCC | 48473  | 49062  | 1      | forward   | Lys  | UAA       | 87     | 7  | 3  | 11 | 5   | 9   | 16 |    |    |
| <i>S. corydalis</i> <sub>49559</sub>  | GGGATGACACCAAGGATGAAAGGACGGATTTGATGACCAAGCTTCGGGGTCAATTCGGGTCTGGCC | 49559  | 49631  | 0      | forward   | Phe  | GAA       | 73     | 7  | 4  | 8  | 5   | 7   | 5  |    |    |
| <i>S. corydalis</i> <sub>53253</sub>  | GGGATGACACCAAGGATGAAAGGACGGATTTGATGACCAAGCTTCGGGGTCAATTCGGGTCTGGCC | 53253  | 53302  | 1      | reverse   | Val  | UAC       | 75     | 7  | 4  | 8  | 4   | 9   | 6  |    |    |
| <i>S. corydalis</i> <sub>54095</sub>  | GGGATGACACCAAGGATGAAAGGACGGATTTGATGACCAAGCTTCGGGGTCAATTCGGGTCTGGCC | 54095  | 54166  | 0      | reverse   | Met  | CAU       | 76     | 4  | 4  | 8  | 5   | 7   | 5  |    |    |
| <i>S. corydalis</i> <sub>68258</sub>  | GGGATGACACCAAGGATGAAAGGACGGATTTGATGACCAAGCTTCGGGGTCAATTCGGGTCTGGCC | 68258  | 68331  | 0      | reverse   | Trp  | CCA       | 74     | 7  | 4  | 9  | 5   | 7   | 5  |    |    |
| <i>S. corydalis</i> <sub>68493</sub>  | GGGATGACACCAAGGATGAAAGGACGGATTTGATGACCAAGCTTCGGGGTCAATTCGGGTCTGGCC | 68493  | 68566  | 0      | reverse   | Pro  | UGG       | 74     | 7  | 4  | 9  | 5   | 7   | 5  |    |    |
| <i>S. corydalis</i> <sub>88447</sub>  | GGGATGACACCAAGGATGAAAGGACGGATTTGATGACCAAGCTTCGGGGTCAATTCGGGTCTGGCC | 88447  | 88520  | 0      | reverse   | Ile  | CAU       | 74     | 7  | 3  | 10 | 5   | 7   | 5  |    |    |
| <i>S. corydalis</i> <sub>96228</sub>  | GGGATGACACCAAGGATGAAAGGACGGATTTGATGACCAAGCTTCGGGGTCAATTCGGGTCTGGCC | 96228  | 96308  | 0      | reverse   | Lys  | GAA       | 81     | 7  | 3  | 10 | 5   | 7   | 13 |    |    |
| <i>S. corydalis</i> <sub>10383</sub>  | GGGATGACACCAAGGATGAAAGGACGGATTTGATGACCAAGCTTCGGGGTCAATTCGGGTCTGGCC | 10383  | 10389  | 0      | forward   | Arg  | UCU       | 72     | 7  | 4  | 9  | 5   | 7   | 5  |    |    |
| <i>S. corydalis</i> <sub>104558</sub> | GGGATGACACCAAGGATGAAAGGACGGATTTGATGACCAAGCTTCGGGGTCAATTCGGGTCTGGCC | 104558 | 105574 | 1      | forward   | Ile  | GAU       | 77     | 4  | 7  | 5  | 12  | 5   |    |    |    |
| <i>S. corydalis</i> <sub>105633</sub> | GGGATGACACCAAGGATGAAAGGACGGATTTGATGACCAAGCTTCGGGGTCAATTCGGGTCTGGCC | 105633 | 106520 | 1      | forward   | Ala  | UGC       | 73     | 7  | 4  | 8  | 5   | 7   | 5  |    |    |
| <i>S. corydalis</i> <sub>110289</sub> | GGGATGACACCAAGGATGAAAGGACGGATTTGATGACCAAGCTTCGGGGTCAATTCGGGTCTGGCC | 110289 | 110362 | 0      | reverse   | Arg  | ACG       | 74     | 7  | 4  | 9  | 5   | 7   | 5  |    |    |
| <i>S. corydalis</i> <sub>110667</sub> | GGGATGACACCAAGGATGAAAGGACGGATTTGATGACCAAGCTTCGGGGTCAATTCGGGTCTGGCC | 110667 | 111038 | 0      | reverse   | Asn  | GUU       | 72     | 7  | 4  | 7  | 5   | 7   | 5  |    |    |
| <i>S. corydalis</i> <sub>116738</sub> | GGGATGACACCAAGGATGAAAGGACGGATTTGATGACCAAGCTTCGGGGTCAATTCGGGTCTGGCC | 116738 | 116817 | 0      | reverse   | Lys  | UAG       | 80     | 7  | 3  | 11 | 5   | 7   | 11 |    |    |
| <i>S. corydalis</i> <sub>132467</sub> | GGGATGACACCAAGGATGAAAGGACGGATTTGATGACCAAGCTTCGGGGTCAATTCGGGTCTGGCC | 132467 | 132588 | 0      | reverse   | Arg  | UCU       | 72     | 7  | 4  | 9  | 5   | 7   | 5  |    |    |
| <i>S. corydalis</i> <sub>133143</sub> | GGGATGACACCAAGGATGAAAGGACGGATTTGATGACCAAGCTTCGGGGTCAATTCGGGTCTGGCC | 133143 | 133216 | 0      | forward   | Arg  | ACG       | 74     | 7  | 4  | 9  | 5   | 7   | 5  |    |    |
| <i>S. corydalis</i> <sub>136985</sub> | GGGATGACACCAAGGATGAAAGGACGGATTTGATGACCAAGCTTCGGGGTCAATTCGGGTCTGGCC | 136985 | 137872 | 1      | reverse   | Ala  | UGC       | 73     | 7  | 4  | 8  | 5   | 7   | 5  |    |    |
| <i>S. corydalis</i> <sub>137931</sub> | GGGATGACACCAAGGATGAAAGGACGGATTTGATGACCAAGCTTCGGGGTCAATTCGGGTCTGGCC | 137931 | 138497 | 1      | reverse   | Ile  | GAU       | 77     | 4  | 7  | 5  | 12  | 5   |    |    |    |
| <i>S. corydalis</i> <sub>140951</sub> | GGGATGACACCAAGGATGAAAGGACGGATTTGATGACCAAGCTTCGGGGTCAATTCGGGTCTGGCC | 140951 | 141028 | 0      | reverse   | Val  | GAC       | 72     | 7  | 4  | 7  | 5   | 7   |    |    |    |
| <i>S. corydalis</i> <sub>141797</sub> | GGGATGACACCAAGGATGAAAGGACGGATTTGATGACCAAGCTTCGGGGTCAATTCGGGTCTGGCC | 141797 | 142177 | 0      | reverse   | Met  | CAU       | 74     | 6  | 4  | 9  | 5   | 7   |    |    |    |
| <i>S. corydalis</i> <sub>154985</sub> | GGGATGACACCAAGGATGAAAGGACGGATTTGATGACCAAGCTTCGGGGTCAATTCGGGTCTGGCC | 154985 | 155058 | 0      | forward   | Ile  | CAU       | 74     | 7  | 3  | 10 | 5   | 7   |    |    |    |
| <i>S. corydalis</i> <sub>156241</sub> | GGGATGACACCAAGGATGAAAGGACGGATTTGATGACCAAGCTTCGGGGTCAATTCGGGTCTGGCC | 156241 | 156314 | 0      | reverse   | Ala  | UGC       | 73     | 7  | 4  | 8  | 5   | 7   |    |    |    |
| <i>S. corydalis</i> <sub>156242</sub> | GGGATGACACCAAGGATGAAAGGACGGATTTGATGACCAAGCTTCGGGGTCAATTCGGGTCTGGCC | 156242 | 156315 | 0      | reverse   | Lys  | UUG       | 74     | 7  | 3  | 11 | 5   | 7   |    |    |    |
| <i>S. corydalis</i> <sub>1841</sub>   | GGGATGACACCAAGGATGAAAGGACGGATTTGATGACCAAGCTTCGGGGTCAATTCGGGTCTGGCC | 1841   | 4433   | 1      | reverse   | Lys  | UUU       | 72     | 7  | 4  | 7  | 4   | 7   |    |    |    |
| <i>S. corydalis</i> <sub>1841</sub>   | GGGATGACACCAAGGATGAAAGGACGGATTTGATGACCAAGCTTCGGGGTCAATTCGGGTCTGGCC | 1841   | 4433   | 1      | reverse   | Lys  | UUU       | 72     | 7  | 4  | 7  | 4   | 7   |    |    |    |
| <i>S. corydalis</i> <sub>1841</sub>   | GGGATGACACCAAGGATGAAAGGACGGATTTGATGACCAAGCTTCGGGGTCAATTCGGGTCTGGCC | 1841   | 4433   | 1      | reverse   | Lys  | UUU       | 72     | 7  | 4  | 7  | 4   | 7   |    |    |    |
| <i>S. corydalis</i> <sub>1841</sub>   | GGGATGACACCAAGGATGAAAGGACGGATTTGATGACCAAGCTTCGGGGTCAATTCGGGTCTGGCC | 1841   | 4433   | 1      | reverse   | Lys  | UUU       | 72     | 7  | 4  | 7  | 4   | 7   |    |    |    |
| <i>S. corydalis</i> <sub>1841</sub>   | GGGATGACACCAAGGATGAAAGGACGGATTTGATGACCAAGCTTCGGGGTCAATTCGGGTCTGGCC | 1841   | 4433   | 1      | reverse   | Lys  | UUU       | 72     | 7  | 4  | 7  | 4   | 7   |    |    |    |
| <i>S. corydalis</i> <sub>1841</sub>   | GGGATGACACCAAGGATGAAAGGACGGATTTGATGACCAAGCTTCGGGGTCAATTCGGGTCTGGCC | 1841   | 4433   | 1      | reverse   | Lys  | UUU       | 72     | 7  | 4  | 7  | 4   | 7   |    |    |    |
| <i>S. corydalis</i> <sub>1841</sub>   | GGGATGACACCAAGGATGAAAGGACGGATTTGATGACCAAGCTTCGGGGTCAATTCGGGTCTGGCC | 1841   | 4433   | 1      | reverse   | Lys  | UUU       | 72     | 7  | 4  | 7  | 4   | 7   |    |    |    |
| <i>S. corydalis</i> <sub>1841</sub>   | GGGATGACACCAAGGATGAAAGGACGGATTTGATGACCAAGCTTCGGGGTCAATTCGGGTCTGGCC | 1841   | 4433   | 1      | reverse   | Lys  | UUU       | 72     | 7  | 4  | 7  | 4   | 7   |    |    |    |
| <i>S. corydalis</i> <sub>1841</sub>   | GGGATGACACCAAGGATGAAAGGACGGATTTGATGACCAAGCTTCGGGGTCAATTCGGGTCTGGCC | 1841   | 4433   | 1      | reverse   | Lys  | UUU       | 72     | 7  | 4  | 7  | 4   | 7   |    |    |    |
| <i>S. corydalis</i> <sub>1841</sub>   | GGGATGACACCAAGGATGAAAGGACGGATTTGATGACCAAGCTTCGGGGTCAATTCGGGTCTGGCC | 1841   | 4433   | 1      | reverse   | Lys  | UUU       | 72     | 7  | 4  | 7  | 4   | 7   |    |    |    |
| <i>S. corydalis</i> <sub>1841</sub>   | GGGATGACACCAAGGATGAAAGGACGGATTTGATGACCAAGCTTCGGGGTCAATTCGGGTCTGGCC | 1841   | 4433   | 1      | reverse   | Lys  | UUU       | 72     | 7  | 4  | 7  | 4   | 7   |    |    |    |
| <i>S. corydalis</i> <sub>1841</sub>   | GGGATGACACCAAGGATGAAAGGACGGATTTGATGACCAAGCTTCGGGGTCAATTCGGGTCTGGCC | 1841   | 4433   | 1      | reverse   | Lys  | UUU       | 72     | 7  | 4  | 7  | 4   | 7   |    |    |    |
| <i>S. corydalis</i> <sub>1841</sub>   | GGGATGACACCAAGGATGAAAGGACGGATTTGATGACCAAGCTTCGGGGTCAATTCGGGTCTGGCC | 1841   | 4433   | 1      | reverse   | Lys  | UUU       | 72     | 7  | 4  | 7  | 4   | 7   |    |    |    |
| <i>S. corydalis</i> <sub>1841</sub>   | GGGATGACACCAAGGATGAAAGGACGGATTTGATGACCAAGCTTCGGGGTCAATTCGGGTCTGGCC | 1841   | 4433   | 1      | reverse   | Lys  | UUU       | 72     | 7  | 4  | 7  | 4   | 7   |    |    |    |
| <i>S. corydalis</i> <sub>1841</sub>   | GGGATGACACCAAGGATGAAAGGACGGATTTGATGACCAAGCTTCGGGGTCAATTCGGGTCTGGCC | 1841   | 4433   | 1      | reverse   | Lys  | UUU       | 72     | 7  | 4  | 7  | 4   | 7   |    |    |    |
| <i>S. corydalis</i> <sub>1841</sub>   | GGGATGACACCAAGGATGAAAGGACGGATTTGATGACCAAGCTTCGGGGTCAATTCGGGTCTGGCC | 1841   | 4433   | 1      | reverse   | Lys  | UUU       | 72     | 7  | 4  | 7  | 4   | 7   |    |    |    |
| <i>S. corydalis</i> <sub>1841</sub>   | GGGATGACACCAAGGATGAAAGGACGGATTTGATGACCAAGCTTCGGGGTCAATTCGGGTCTGGCC | 1841   | 4433   | 1      | reverse   | Lys  | UUU       | 72     | 7  | 4  | 7  | 4   | 7   |    |    |    |
| <i>S. corydalis</i> <sub>1841</sub>   | GGGATGACACCAAGGATGAAAGGACGGATTTGATGACCAAGCTTCGGGGTCAATTCGGGTCTGGCC | 1841   | 4433   | 1      | reverse   | Lys  | UUU       | 72     | 7  | 4  | 7  | 4   | 7   |    |    |    |
| <i>S. corydalis</i> <sub>1841</sub>   | GGGATGACACCAAGGATGAAAGGACGGATTTGATGACCAAGCTTCGGGGTCAATTCGGGTCTGGCC | 1841   | 4433   | 1      | reverse   | Lys  | UUU       | 72     | 7  | 4  | 7  | 4   | 7   |    |    |    |
| <i>S. corydalis</i> <sub>1841</sub>   | GGGATGACACCAAGGATGAAAGGACGGATTTGATGACCAAGCTTCGGGGTCAATTCGGGTCTGGCC | 1841   | 4433   | 1      | reverse   | Lys  | UUU       | 72     | 7  | 4  | 7  | 4   | 7   |    |    |    |
| <i>S. corydalis</i> <sub>1841</sub>   | GGGATGACACCAAGGATGAAAGGACGGATTTGATGACCAAGCTTCGGGGTCAATTCGGGTCTGGCC | 1841   | 4433   | 1      | reverse   | Lys  | UUU       | 72     | 7  | 4  | 7  | 4   | 7   |    |    |    |
| <i>S. corydalis</i> <sub>1841</sub>   | GGGATGACACCAAGGATGAAAGGACGGATTTGATGACCAAGCTTCGGGGTCAATTCGGGTCTGGCC | 1841   | 4433   | 1      | reverse   | Lys  | UUU       | 72     | 7  | 4  | 7  | 4   | 7   |    |    |    |
| <i>S. corydalis</i> <sub>1841</sub>   | GGGATGACACCAAGGATGAAAGGACGGATTTGATGACCAAGCTTCGGGGTCAATTCGGGTCTGGCC | 1841   | 4433   | 1      | reverse   | Lys  | UUU       | 72     | 7  | 4  | 7  | 4   | 7   |    |    |    |
| <i>S. corydalis</i> <sub>1841</sub>   | GGGATGACACCAAGGATGAAAGGACGGATTTGATGACCAAGCTTCGGGGTCAATTCGGGTCTGGCC | 1841   | 4433   | 1      | reverse   | Lys  | UUU       | 72     | 7  | 4  | 7  | 4   | 7   |    |    |    |
| <i>S. corydalis</i> <sub>1841</sub>   | GGGATGACACCAAGGATGAAAGGACGGATTTGATGACCAAGCTTCGGGGTCAATTCGGGTCTGGCC | 1841   | 4433   | 1      | reverse   | Lys  | UUU       | 72     | 7  | 4  | 7  | 4   | 7   |    |    |    |
| <i>S. corydalis</i> <sub>1841</sub>   | GGGATGACACCAAGGATGAAAGGACGGATTTGATGACCAAGCTTCGGGGTCAATTCGGGTCTGGCC | 1841   | 4433   | 1      | reverse   | Lys  | UUU       | 72     | 7  | 4  | 7  | 4   | 7   |    |    |    |
| <i>S. corydalis</i> <sub>1841</sub>   | GGGATGACACCAAGGATGAAAGGACGGATTTGATGACCAAGCTTCGGGGTCAATTCGGGTCTGGCC | 1841   | 4433   | 1      | reverse   | Lys  | UUU       | 72     | 7  | 4  | 7  | 4   | 7   |    |    |    |
| <i>S. corydalis</i> <sub>1841</sub>   | GGGATGACACCAAGGATGAAAGGACGGATTTGATGACCAAGCTTCGGGGTCAATTCGGGTCTGGCC | 1841   | 4433   | 1      | reverse   | Lys  | UUU       | 72     | 7  | 4  | 7  | 4   | 7   |    |    |    |
| <i>S. corydalis</i> <sub>1841</sub>   | GGGATGACACCAAGGATGAAAGGACGGATTTGATGACCAAGCTTCGGGGTCAATTCGGGTCTGGCC | 1841   | 4433   | 1      | reverse   | Lys  | UUU       | 72     | 7  | 4  | 7  | 4   | 7   |    |    |    |
| <i>S. corydalis</i> <sub>1841</sub>   | GGGATGACACCAAGGATGAAAGGACGGATTTGATGACCAAGCTTCGGGGTCAATTCGGGTCTGGCC | 1841   | 4433   | 1      | reverse   | Lys  | UUU       | 72     | 7  | 4  | 7  | 4   | 7   |    |    |    |
| <i>S. corydalis</i> <sub>1841</sub>   | GGGATGACACCAAGGATGAAAGGACGGATTTGATGACCAAGCTTCGGGGTCAATTCGGGTCTGGCC | 1841   | 4433   | 1      | reverse   | Lys  | UUU       | 72     | 7  | 4  | 7  | 4   | 7   |    |    |    |
| <i>S. corydalis</i> <sub>1841</sub>   | GGGATGACACCAAGGATGAAAGGACGGATTTGATGACCAAGCTTCGGGGTCAAT             |        |        |        |           |      |           |        |    |    |    |     |     |    |    |    |
