# Supplementary material for: Phylogeny and evolution of chloroplast tRNAs in Adoxaceae
Source: PubMed Central journal article supplement (PMC7863635; doi:10.1002/ece3.7133), 2021-01-06
Supplement: ECE3-11-1294-s003.pdf [file ECE3-11-1294-s003.pdf]

## Supplementary Table 2

### Supplementary Table 2-a

The number of duplication, loss, co-divergence and transfer events, and their related species. Analysis results by NOTUNG 2.9.

| Species                 | Duplications | Co-Divergences | Transfers_from | Transfers_to | Losses |
|-------------------------|--------------|----------------|----------------|--------------|--------|
| >1 sp. Adoxaceae        | 20           | 5              | 0              | 0            | 7      |
| <i>V. utile</i>         | 6            | 0              | 4              | 21           | 4      |
| <i>T. omeiensis</i>     | 7            | 0              | 24             | 3            | 7      |
| n41                     | 14           | 0              | 0              | 0            | 0      |
| <i>A. moschatellina</i> | 0            | 0              | 0              | 3            | 0      |
| <i>S. corydalifolia</i> | 1            | 0              | 1              | 3            | 1      |
| <i>S. williamsii</i>    | 6            | 0              | 26             | 25           | 4      |
| n39                     | 6            | 0              | 0              | 0            | 6      |
| Total                   | 60           | 5              | 55             | 55           | 29     |

### Supplementary Table 2-b

The number of transfer events, and the related recipient species and donor species. Analysis results by NOTUNG 2.9.

| To\From(sp.)            | <i>S. corydalifolia</i> | <i>A. moschatellina</i> | <i>T. omeiensis</i> | <i>S. williamsii</i> | <i>V. utile</i> |
|-------------------------|-------------------------|-------------------------|---------------------|----------------------|-----------------|
| <i>S. corydalifolia</i> | -                       | 0                       | 0                   | 2                    | 1               |
| <i>A. moschatellina</i> | 1                       | -                       | 0                   | 1                    | 1               |
| <i>T. omeiensis</i>     | 0                       | 0                       | -                   | 2                    | 1               |
| <i>S. williamsii</i>    | 0                       | 0                       | 24                  | -                    | 1               |
| <i>V. utile</i>         | 0                       | 0                       | 0                   | 21                   | -               |

### Supplementary Table 2-c

Loss events of chloroplast tRNA genes and species in which they lost. Analysis results by NOTUNG 2.9.

| Lost in Species     | tRNA Gene                       | Species                 | isotype | Anti-codon |
|---------------------|---------------------------------|-------------------------|---------|------------|
| <i>T. omeiensis</i> | <i>A. moschatellina</i> _102545 | <i>A. moschatellina</i> | Val     | GAC        |
|                     | <i>A. moschatellina</i> _140963 | <i>A. moschatellina</i> | Val     | GAC        |
|                     | <i>T. omeiensis</i> _102753     | <i>T. omeiensis</i>     | Val     | GAC        |
|                     | <i>T. omeiensis</i> _141205     | <i>T. omeiensis</i>     | Val     | GAC        |
|                     | <i>S. williamsii</i> _103115    | <i>S. williamsii</i>    | Val     | GAC        |
|                     | <i>S. williamsii</i> _141930    | <i>S. williamsii</i>    | Val     | GAC        |
|                     | <i>V. utile</i> _102789         | <i>V. utile</i>         | Val     | GAC        |
|                     | <i>V. utile</i> _141340         | <i>V. utile</i>         | Val     | GAC        |
| n39                 | <i>S. corydalifolia</i> _102483 | <i>S. corydalifolia</i> | Val     | GAC        |
| <i>V. utile</i> ,   | <i>S. corydalifolia</i> _102483 | <i>S. corydalifolia</i> | Val     | GAC        |

|                        |                         |                         |                         |     |     |
|------------------------|-------------------------|-------------------------|-------------------------|-----|-----|
| <i>S. williamsii</i>   | S. corydalifolia_140951 | <i>S. corydalifolia</i> | Val                     | GAC |     |
|                        | A. moschatellina_102545 | <i>A. moschatellina</i> | Val                     | GAC |     |
|                        | A. moschatellina_140963 | <i>A. moschatellina</i> | Val                     | GAC |     |
|                        | T. omeiensis_102753     | <i>T. omeiensis</i>     | Val                     | GAC |     |
|                        | T. omeiensis_141205     | <i>T. omeiensis</i>     | Val                     | GAC |     |
|                        | S. williamsii_103115    | <i>S. williamsii</i>    | Val                     | GAC |     |
|                        | S. williamsii_141930    | <i>S. williamsii</i>    | Val                     | GAC |     |
|                        | V. utile_102789         | <i>V. utile</i>         | Val                     | GAC |     |
|                        | V. utile_141340         | <i>V. utile</i>         | Val                     | GAC |     |
|                        | S. corydalifolia_53253  | <i>S. corydalifolia</i> | Val                     | UAC |     |
|                        | A. moschatellina_53131  | <i>A. moschatellina</i> | Val                     | UAC |     |
|                        | T. omeiensis_53193      | <i>T. omeiensis</i>     | Val                     | UAC |     |
|                        | S. williamsii_53583     | <i>S. williamsii</i>    | Val                     | UAC |     |
|                        | V. utile_53289          | <i>V. utile</i>         | Val                     | UAC |     |
|                        | S. corydalifolia_105633 | <i>S. corydalifolia</i> | Ala                     | UGC |     |
|                        | S. corydalifolia_136985 | <i>S. corydalifolia</i> | Ala                     | UGC |     |
|                        | A. moschatellina_105701 | <i>A. moschatellina</i> | Ala                     | UGC |     |
|                        | A. moschatellina_136991 | <i>A. moschatellina</i> | Ala                     | UGC |     |
|                        | T. omeiensis_105909     | <i>T. omeiensis</i>     | Ala                     | UGC |     |
|                        | T. omeiensis_137233     | <i>T. omeiensis</i>     | Ala                     | UGC |     |
|                        | S. williamsii_106272    | <i>S. williamsii</i>    | Ala                     | UGC |     |
|                        | S. williamsii_137957    | <i>S. williamsii</i>    | Ala                     | UGC |     |
|                        | V. utile_105946         | <i>V. utile</i>         | Ala                     | UGC |     |
|                        | V. utile_137367         | <i>V. utile</i>         | Ala                     | UGC |     |
|                        | S. corydalifolia_31544  | <i>S. corydalifolia</i> | Asp                     | GUC |     |
|                        | A. moschatellina_31464  | <i>A. moschatellina</i> | Asp                     | GUC |     |
|                        | T. omeiensis_31515      | <i>T. omeiensis</i>     | Asp                     | GUC |     |
|                        | S. williamsii_31763     | <i>S. williamsii</i>    | Asp                     | GUC |     |
|                        | V. utile_31685          | <i>V. utile</i>         | Asp                     | GUC |     |
|                        | <i>S. williamsii</i>    | S. corydalifolia_54095  | <i>S. corydalifolia</i> | Met | CAU |
|                        |                         | A. moschatellina_53974  | <i>A. moschatellina</i> | Met | CAU |
|                        |                         | T. omeiensis_54032      | <i>T. omeiensis</i>     | Met | CAU |
| S. williamsii_54418    |                         | <i>S. williamsii</i>    | Met                     | CAU |     |
| V. utile_54115         |                         | <i>V. utile</i>         | Met                     | CAU |     |
| S. corydalifolia_47633 |                         | <i>S. corydalifolia</i> | Thr                     | UGU |     |
| A. moschatellina_47541 |                         | <i>A. moschatellina</i> | Thr                     | UGU |     |
| T. omeiensis_47591     |                         | <i>T. omeiensis</i>     | Thr                     | UGU |     |
| S. williamsii_48092    |                         | <i>S. williamsii</i>    | Thr                     | UGU |     |
| V. utile_48048         |                         | <i>V. utile</i>         | Thr                     | UGU |     |
| S. corydalifolia_32668 |                         | <i>S. corydalifolia</i> | Thr                     | GGU |     |
| A. moschatellina_32589 |                         | <i>A. moschatellina</i> | Thr                     | GGU |     |
| T. omeiensis_32640     |                         | <i>T. omeiensis</i>     | Thr                     | GGU |     |
| S. williamsii_32967    |                         | <i>S. williamsii</i>    | Thr                     | GGU |     |
| V. utile_32906         |                         | <i>V. utile</i>         | Thr                     | GGU |     |

|                      |                         |                         |      |     |
|----------------------|-------------------------|-------------------------|------|-----|
|                      | S. corydalifolia_48473  | <i>S. corydalifolia</i> | Leu  | UAA |
|                      | A. moschatellina_48385  | <i>A. moschatellina</i> | Leu  | UAA |
|                      | T. omeiensis_48411      | <i>T. omeiensis</i>     | Leu  | UAA |
|                      | S. williamsii_48956     | <i>S. williamsii</i>    | Leu  | UAA |
|                      | V. utile_48840          | <i>V. utile</i>         | Leu  | UAA |
|                      | S. corydalifolia_8887   | <i>S. corydalifolia</i> | Ser  | GCU |
|                      | S. corydalifolia_36817  | <i>S. corydalifolia</i> | Ser  | UGA |
| <i>V. utile,</i>     | A. moschatellina_8841   | <i>A. moschatellina</i> | Ser  | GCU |
| <i>S. williamsii</i> | A. moschatellina_36732  | <i>A. moschatellina</i> | Ser  | UGA |
|                      | T. omeiensis_8919       | <i>T. omeiensis</i>     | Ser  | GCU |
|                      | T. omeiensis_36777      | <i>T. omeiensis</i>     | Ser  | UGA |
|                      | S. williamsii_9088      | <i>S. williamsii</i>    | Ser  | GCU |
|                      | S. williamsii_37050     | <i>S. williamsii</i>    | Ser  | UGA |
|                      | V. utile_9059           | <i>V. utile</i>         | Ser  | GCU |
|                      | V. utile_36807          | <i>V. utile</i>         | Ser  | UGA |
|                      | S. corydalifolia_38018  | <i>S. corydalifolia</i> | fMet | CAU |
|                      | A. moschatellina_37933  | <i>A. moschatellina</i> | fMet | CAU |
| <i>V. utile</i>      | T. omeiensis_37979      | <i>T. omeiensis</i>     | fMet | CAU |
|                      | S. williamsii_38226     | <i>S. williamsii</i>    | fMet | CAU |
|                      | V. utile_37980          | <i>V. utile</i>         | fMet | CAU |
|                      | S. corydalifolia_68493  | <i>S. corydalifolia</i> | Pro  | UGG |
|                      | A. moschatellina_68378  | <i>A. moschatellina</i> | Pro  | UGG |
| <i>S. williamsii</i> | T. omeiensis_68668      | <i>T. omeiensis</i>     | Pro  | UGG |
|                      | S. williamsii_69164     | <i>S. williamsii</i>    | Pro  | UGG |
|                      | V. utile_68872          | <i>V. utile</i>         | Pro  | UGG |
|                      | A. moschatellina_104620 | <i>A. moschatellina</i> | Ile  | GAU |
| <i>T. omeiensis</i>  | A. moschatellina_110341 | <i>A. moschatellina</i> | Arg  | ACG |
|                      | S. corydalifolia_104558 | <i>S. corydalifolia</i> | Ile  | GAU |
| n39                  | S. corydalifolia_110289 | <i>S. corydalifolia</i> | Arg  | ACG |
|                      | S. corydalifolia_104558 | <i>S. corydalifolia</i> | Ile  | GAU |
|                      | S. corydalifolia_137931 | <i>S. corydalifolia</i> | Ile  | GAU |
|                      | A. moschatellina_104620 | <i>A. moschatellina</i> | Ile  | GAU |
|                      | A. moschatellina_137942 | <i>A. moschatellina</i> | Ile  | GAU |
|                      | T. omeiensis_104828     | <i>T. omeiensis</i>     | Ile  | GAU |
|                      | T. omeiensis_138184     | <i>T. omeiensis</i>     | Ile  | GAU |
| <i>V. utile,</i>     | S. williamsii_105190    | <i>S. williamsii</i>    | Ile  | GAU |
| <i>S. williamsii</i> | S. williamsii_138908    | <i>S. williamsii</i>    | Ile  | GAU |
|                      | V. utile_104863         | <i>V. utile</i>         | Ile  | GAU |
|                      | V. utile_138319         | <i>V. utile</i>         | Ile  | GAU |
|                      | S. corydalifolia_1839   | <i>S. corydalifolia</i> | Lys  | UUU |
|                      | A. moschatellina_1841   | <i>A. moschatellina</i> | Lys  | UUU |
|                      | T. omeiensis_1911       | <i>T. omeiensis</i>     | Lys  | UUU |
|                      | S. williamsii_1819      | <i>S. williamsii</i>    | Lys  | UUU |
|                      | V. utile_1763           | <i>V. utile</i>         | Lys  | UUU |

|                         |                         |                         |      |     |
|-------------------------|-------------------------|-------------------------|------|-----|
|                         | S. corydalifolia_110289 | <i>S. corydalifolia</i> | Arg  | ACG |
|                         | S. corydalifolia_133143 | <i>S. corydalifolia</i> | Arg  | ACG |
|                         | A. moschatellina_110341 | <i>A. moschatellina</i> | Arg  | ACG |
|                         | A. moschatellina_133165 | <i>A. moschatellina</i> | Arg  | ACG |
|                         | T. omeiensis_110558     | <i>T. omeiensis</i>     | Arg  | ACG |
|                         | T. omeiensis_133398     | <i>T. omeiensis</i>     | Arg  | ACG |
|                         | S. williamsii_110920    | <i>S. williamsii</i>    | Arg  | ACG |
|                         | S. williamsii_134123    | <i>S. williamsii</i>    | Arg  | ACG |
|                         | V. utile_110593         | <i>V. utile</i>         | Arg  | ACG |
|                         | V. utile_133534         | <i>V. utile</i>         | Arg  | ACG |
| <i>T. omeiensis</i>     | A. moschatellina_7675   | <i>A. moschatellina</i> | Gln  | UUG |
| <i>S. corydalifolia</i> | A. moschatellina_7676   | <i>A. moschatellina</i> | Gln  | UUG |
|                         | S. corydalifolia_49559  | <i>S. corydalifolia</i> | Phe  | GAA |
|                         | A. moschatellina_49526  | <i>A. moschatellina</i> | Phe  | GAA |
|                         | T. omeiensis_49590      | <i>T. omeiensis</i>     | Phe  | GAA |
|                         | S. williamsii_49928     | <i>S. williamsii</i>    | Phe  | GAA |
|                         | V. utile_49808          | <i>V. utile</i>         | Phe  | GAA |
|                         | S. corydalifolia_28834  | <i>S. corydalifolia</i> | Cys  | GCA |
|                         | A. moschatellina_28782  | <i>A. moschatellina</i> | Cys  | GCA |
| <i>S. williamsii</i>    | T. omeiensis_28829      | <i>T. omeiensis</i>     | Cys  | GCA |
|                         | S. williamsii_29055     | <i>S. williamsii</i>    | Cys  | GCA |
|                         | V. utile_28913          | <i>V. utile</i>         | Cys  | GCA |
|                         | S. corydalifolia_31723  | <i>S. corydalifolia</i> | Tyr  | GUA |
|                         | A. moschatellina_31642  | <i>A. moschatellina</i> | Tyr  | GUA |
|                         | T. omeiensis_31693      | <i>T. omeiensis</i>     | Tyr  | GUA |
|                         | S. williamsii_31941     | <i>S. williamsii</i>    | Tyr  | GUA |
|                         | V. utile_31868          | <i>V. utile</i>         | Tyr  | GUA |
|                         | S. corydalifolia_28834  | <i>S. corydalifolia</i> | Cys  | GCA |
|                         | A. moschatellina_28782  | <i>A. moschatellina</i> | Cys  | GCA |
|                         | T. omeiensis_28829      | <i>T. omeiensis</i>     | Cys  | GCA |
|                         | S. williamsii_29055     | <i>S. williamsii</i>    | Cys  | GCA |
|                         | V. utile_28913          | <i>V. utile</i>         | Cys  | GCA |
| <i>V. utile</i>         | S. corydalifolia_31723  | <i>S. corydalifolia</i> | Tyr  | GUA |
|                         | A. moschatellina_31642  | <i>A. moschatellina</i> | Tyr  | GUA |
|                         | T. omeiensis_31693      | <i>T. omeiensis</i>     | Tyr  | GUA |
|                         | S. williamsii_31941     | <i>S. williamsii</i>    | Tyr  | GUA |
|                         | V. utile_31868          | <i>V. utile</i>         | Tyr  | GUA |
| <i>T. omeiensis</i>     | A. moschatellina_132489 | <i>A. moschatellina</i> | Asn  | GUU |
|                         | A. moschatellina_155141 | <i>A. moschatellina</i> | Ile2 | CAU |
| n39                     | S. corydalifolia_132467 | <i>S. corydalifolia</i> | Asn  | GUU |
|                         | S. corydalifolia_154985 | <i>S. corydalifolia</i> | Ile2 | CAU |
| <i>V. utile,</i>        | S. corydalifolia_88447  | <i>S. corydalifolia</i> | Ile2 | CAU |
| <i>S. williamsii</i>    | S. corydalifolia_154985 | <i>S. corydalifolia</i> | Ile2 | CAU |
|                         | A. moschatellina_88365  | <i>A. moschatellina</i> | Ile2 | CAU |

|                                          |                         |                         |      |     |
|------------------------------------------|-------------------------|-------------------------|------|-----|
|                                          | A. moschatellina_155141 | <i>A. moschatellina</i> | Ile2 | CAU |
|                                          | T. omeiensis_88597      | <i>T. omeiensis</i>     | Ile2 | CAU |
|                                          | T. omeiensis_155359     | <i>T. omeiensis</i>     | Ile2 | CAU |
|                                          | S. williamsii_88952     | <i>S. williamsii</i>    | Ile2 | CAU |
|                                          | S. williamsii_156091    | <i>S. williamsii</i>    | Ile2 | CAU |
|                                          | V. utile_88625          | <i>V. utile</i>         | Ile2 | CAU |
|                                          | V. utile_155502         | <i>V. utile</i>         | Ile2 | CAU |
|                                          | S. corydalifolia_110967 | <i>S. corydalifolia</i> | Asn  | GUU |
|                                          | S. corydalifolia_132467 | <i>S. corydalifolia</i> | Asn  | GUU |
|                                          | A. moschatellina_111019 | <i>A. moschatellina</i> | Asn  | GUU |
|                                          | A. moschatellina_132489 | <i>A. moschatellina</i> | Asn  | GUU |
|                                          | T. omeiensis_111236     | <i>T. omeiensis</i>     | Asn  | GUU |
|                                          | T. omeiensis_132722     | <i>T. omeiensis</i>     | Asn  | GUU |
|                                          | S. williamsii_111597    | <i>S. williamsii</i>    | Asn  | GUU |
|                                          | S. williamsii_133448    | <i>S. williamsii</i>    | Asn  | GUU |
|                                          | V. utile_111279         | <i>V. utile</i>         | Asn  | GUU |
|                                          | V. utile_132850         | <i>V. utile</i>         | Asn  | GUU |
|                                          | S. corydalifolia_68258  | <i>S. corydalifolia</i> | Trp  | CCA |
|                                          | A. moschatellina_68143  | <i>A. moschatellina</i> | Trp  | CCA |
|                                          | T. omeiensis_68433      | <i>T. omeiensis</i>     | Trp  | CCA |
|                                          | S. williamsii_68929     | <i>S. williamsii</i>    | Trp  | CCA |
|                                          | V. utile_68623          | <i>V. utile</i>         | Trp  | CCA |
|                                          | S. corydalifolia_10668  | <i>S. corydalifolia</i> | Arg  | UCU |
|                                          | A. moschatellina_10639  | <i>A. moschatellina</i> | Arg  | UCU |
|                                          | T. omeiensis_10700      | <i>T. omeiensis</i>     | Arg  | UCU |
|                                          | S. williamsii_10898     | <i>S. williamsii</i>    | Arg  | UCU |
|                                          | V. utile_10799          | <i>V. utile</i>         | Arg  | UCU |
| <i>S. williamsii</i>                     | S. corydalifolia_31871  | <i>S. corydalifolia</i> | Glu  | UUC |
|                                          | A. moschatellina_31790  | <i>A. moschatellina</i> | Glu  | UUC |
|                                          | T. omeiensis_31841      | <i>T. omeiensis</i>     | Glu  | UUC |
|                                          | S. williamsii_32089     | <i>S. williamsii</i>    | Glu  | UUC |
|                                          | V. utile_32016          | <i>V. utile</i>         | Glu  | UUC |
|                                          | S. corydalifolia_31871  | <i>S. corydalifolia</i> | Glu  | UUC |
|                                          | A. moschatellina_31790  | <i>A. moschatellina</i> | Glu  | UUC |
| <i>V. utile</i>                          | T. omeiensis_31841      | <i>T. omeiensis</i>     | Glu  | UUC |
|                                          | S. williamsii_32089     | <i>S. williamsii</i>    | Glu  | UUC |
|                                          | V. utile_32016          | <i>V. utile</i>         | Glu  | UUC |
|                                          | S. corydalifolia_116738 | <i>S. corydalifolia</i> | Leu  | UAG |
|                                          | A. moschatellina_116790 | <i>A. moschatellina</i> | Leu  | UAG |
| <i>V. utile,</i><br><i>S. williamsii</i> | T. omeiensis_116957     | <i>T. omeiensis</i>     | Leu  | UAG |
|                                          | S. williamsii_117749    | <i>S. williamsii</i>    | Leu  | UAG |
|                                          | V. utile_117229         | <i>V. utile</i>         | Leu  | UAG |
| <i>V. utile</i>                          | S. williamsii_96741     | <i>S. williamsii</i>    | Leu  | CAA |
| <i>T. omeiensis</i>                      | A. moschatellina_96140  | <i>A. moschatellina</i> | Leu  | CAA |

**Supplementary Table 2-d**

The number of speciation, duplication, loss and transfer events, and their related species.

Analysis results by GeneRax v1.2.2.

| Species                 | Speciation | Duplications | Transfers_from | Transfers_to | Losses |
|-------------------------|------------|--------------|----------------|--------------|--------|
| <i>V. utile</i>         | 37         | 0            | 0              | 0            | 0      |
| <i>T. omeiensis</i>     | 37         | 1            | 0              | 0            | 0      |
| <i>A. moschatellina</i> | 37         | 1            | 0              | 0            | 0      |
| <i>S. corydalifolia</i> | 37         | 1            | 0              | 0            | 0      |
| <i>S. williamsii</i>    | 37         | 0            | 0              | 0            | 0      |
| n0                      | 37         | 0            | 0              | 0            | 2      |
| n1                      | 37         | 1            | 0              | 0            | 1      |
| n2                      | 37         | 0            | 0              | 0            | 1      |
| n3                      | 37         | 36           | 0              | 0            | 0      |
| Total                   | 60         | 5            | 55             | 55           | 29     |
